# Supplementary material
Source: publisher figshare collection journal article supplement (https://acs.figshare.com/ndownloader/files/4547929)
Supplement: Supplementary file 1 [file 4547929]

## Supporting Information for

### “Spectroscopy and Electronic Structures of Ru<sub>2</sub>(ap)<sub>4</sub>-alkynyl Compounds”

Lei Zhang, Bin Xi, Isiah P. C. Liu, M. M. R. Choudhuri, Robert J. Crutchley, James B. Updegraff, John D. Protasiewicz and Tong Ren

*Preparation of 2-(3-*i*-butoxyanilino)pyridine (H<sup>i</sup>BuOap).*

(a) *(3-*i*-butoxy-phenyl)-carbamic acid tert-butyl ester.* A mixture of 3-(*N*-*t*-butyloxycarbonylamino)phenol (8.2 g, 39 mmol), 1-bromo-2-methylpropane (7.0 mL, 64 mmol), potassium carbonate (15.0 g, 108 mmol) and NaI (0.50 g, 3.3 mmol) in 250 mL dimethylformamide was stirred at 60 °C for 48 h. The reaction mixture was poured into ice water, and extracted with ethyl acetate. The organic phase was washed with brine and dried over Na<sub>2</sub>SO<sub>4</sub>. Brown oil was obtained upon the solvent removal. Recrystallization in CH<sub>2</sub>Cl<sub>2</sub> and hexanes afforded (3-*i*-butoxy-phenyl)-carbamic acid tert-butyl ester as white crystals (9.6 g, 92%). <sup>1</sup>H NMR: 7.18-7.10 (m, 1H, aromatic), 6.80-6.47 (m, 3H, aromatic), 3.72-3.69 (m, 2H, OCH<sub>2</sub>CH(CH<sub>3</sub>)<sub>2</sub>), 2.05 (s, 1H, OCH<sub>2</sub>CH(CH<sub>3</sub>)<sub>2</sub>), 1.55-1.52 (m, 9H, OC(CH<sub>3</sub>)<sub>3</sub>), 1.03-1.00 (m, 6H, OCH<sub>2</sub>CH(CH<sub>3</sub>)<sub>2</sub>).

(b) *3-Isobutoxy-aniline.* To a solution of (3-isobutoxy-phenyl)-carbamic acid tert-butyl ester (1.49 g, 5.6 mmol) in 30 mL dichloromethane, trifluoroacetic acid (1 mL, 13.5 mmol) was added at 0 °C. Then the solution was warmed to room temperature, and was

stirred overnight. After neutralization with NaOH solution, the reaction mixture was extracted with CH<sub>2</sub>Cl<sub>2</sub>. The organic layer was washed with brine and dried over Na<sub>2</sub>SO<sub>4</sub>. Upon solvent removal, brown oil was obtained (0.89 g, 57%). <sup>1</sup>H NMR: 7.24-7.17 (m, 1H, aromatic), 6.77-6.72 (m, 3H, aromatic), 3.65 (d, *J*=3.2Hz, 2H, OCH<sub>2</sub>CH(CH<sub>3</sub>)<sub>2</sub>), 2.07-1.98 (m, 1H, OCH<sub>2</sub>CH(CH<sub>3</sub>)<sub>2</sub>), 1.00-0.97 (m, 6H, OCH<sub>2</sub>CH(CH<sub>3</sub>)<sub>2</sub>).

## Spectroelectrochemistry of Compound 3: Irreversible Oxidation

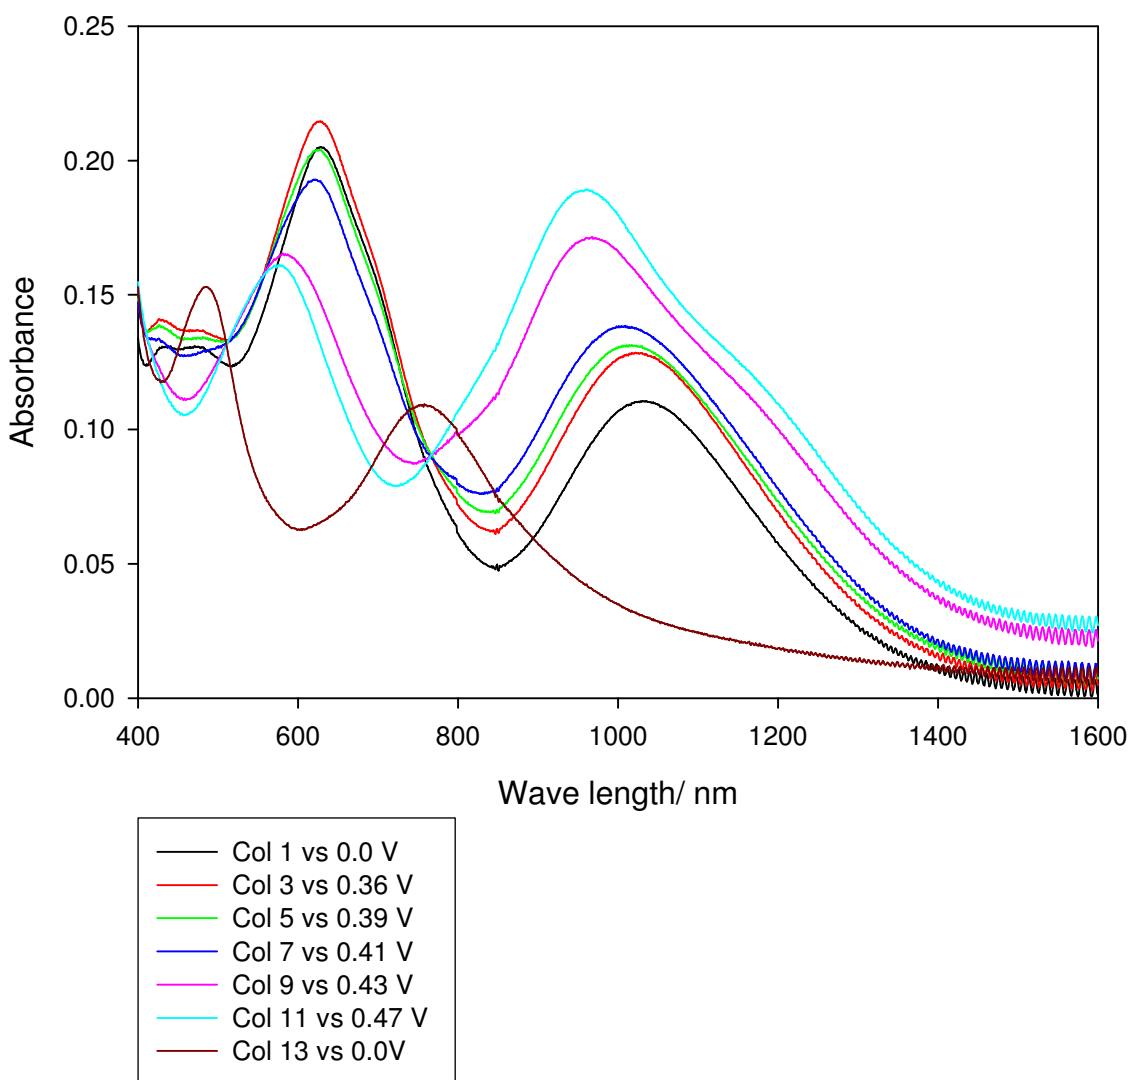

The figure shows that when you oxidized **3**, you get the spectrum of oxidized **2** (Figure 7a). Upon reduction (col 13 vs 0.0 V), one gets the spectrum of **2** (Figure 8)
